# Supplementary material
Source: PubMed Central journal article supplement (PMC8804805)

## Supplementary materials

### **Validation of the diagnostic and prognostic values of ADAMTS5 and FSTL1 in osteoarthritis rat model**

Bakheet E. M. Elsadek (Ass. Prof.)<sup>1,\*</sup>, Ahmed A. Abdelghany (Ass. Prof.)<sup>1</sup>, Mohamed A. Abd EL-Aziz (Prof.)<sup>1</sup>, Hafez R. Madkor (Ass. Prof.)<sup>1</sup>, Ahmed Abd Elrady Ahmed (MD)<sup>2</sup>, Sary Kh. Abd-Elghaffar (Prof.)<sup>3</sup> and Amer A. M. Elsadek (MD)<sup>4</sup>

<sup>1</sup>Department of Biochemistry, Faculty of Pharmacy, Al-Azhar University, Assiut Branch, P.O. Box 71524 Assiut, Egypt

<sup>2</sup>Department of Radiology, Faculty of Medicine, Al-Azhar University, Assiut Branch, P.O. Box 71524 Assiut, Egypt

<sup>3</sup>Department of Pathology, Faculty of Veterinary Medicine, Assiut University, Assiut, P.O. Box 71526, Assiut, Egypt

<sup>4</sup>Department of Orthopaedic and Trauma Surgery, Faculty of Medicine, Al-Azhar University, Assiut Branch, P.O. Box 71524 Assiut, Egypt

**\*Corresponding author:** *To whom correspondence should be addressed:*

*Dr. Bakheet Elsadek, Associate Professor of Biochemistry, Faculty of Pharmacy, Al-Azhar University, Assiut Branch, P. O. Box 71524, Assiut, Egypt. E-mail: [bakheet.elkot@azhar.edu.eg](mailto:bakheet.elkot@azhar.edu.eg); Tel.: +201110596270; Fax: +20934801212*

ORCID: 0000-0001-5444-0245

**Figure S1 (A-F):** Multiple exposures of different blots with several contrast

**(A):** ADAMTS5 blot 1

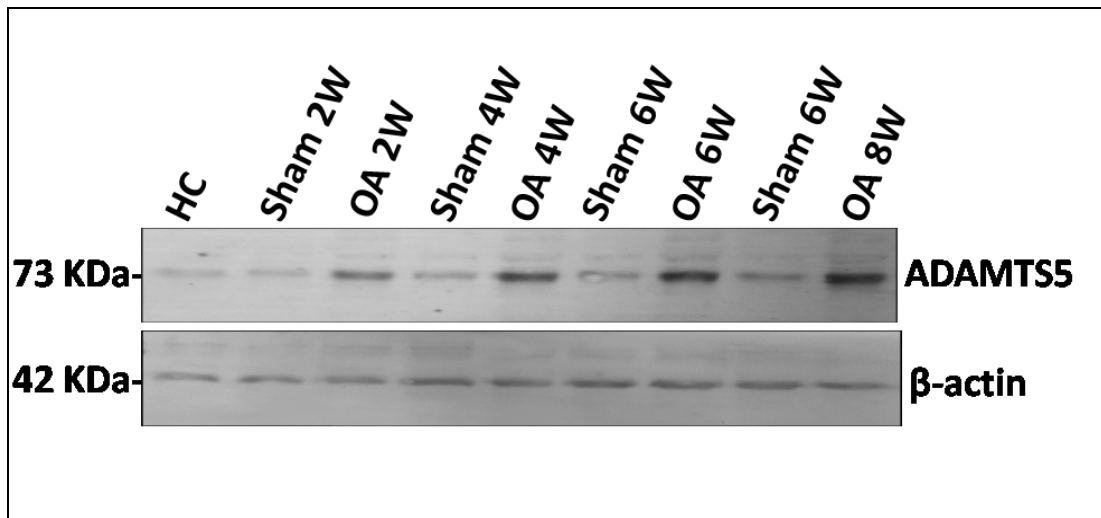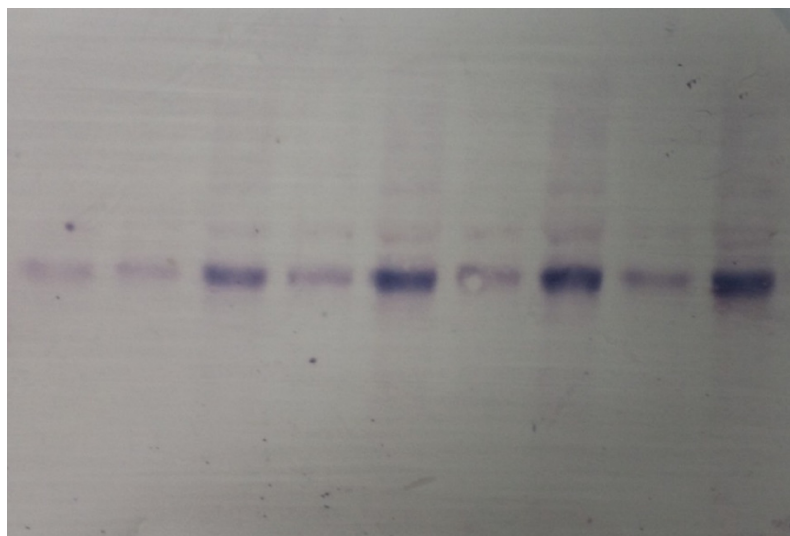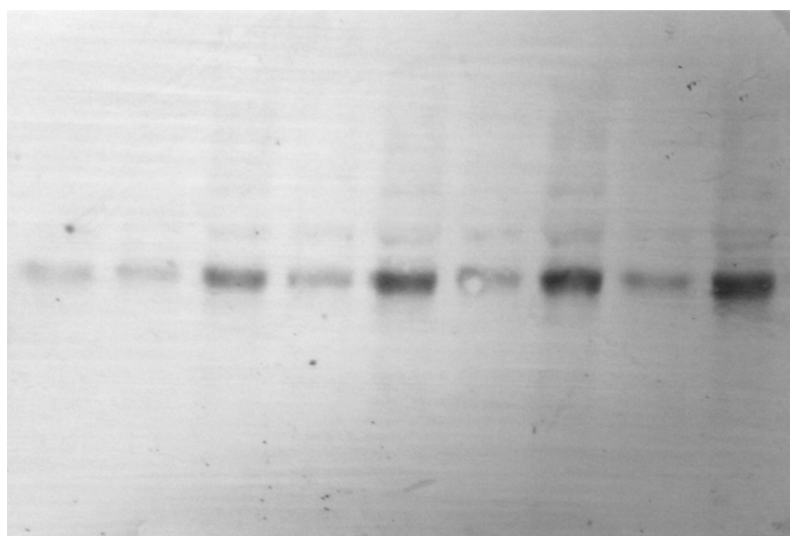

(B): ADAMTS5 blot 2

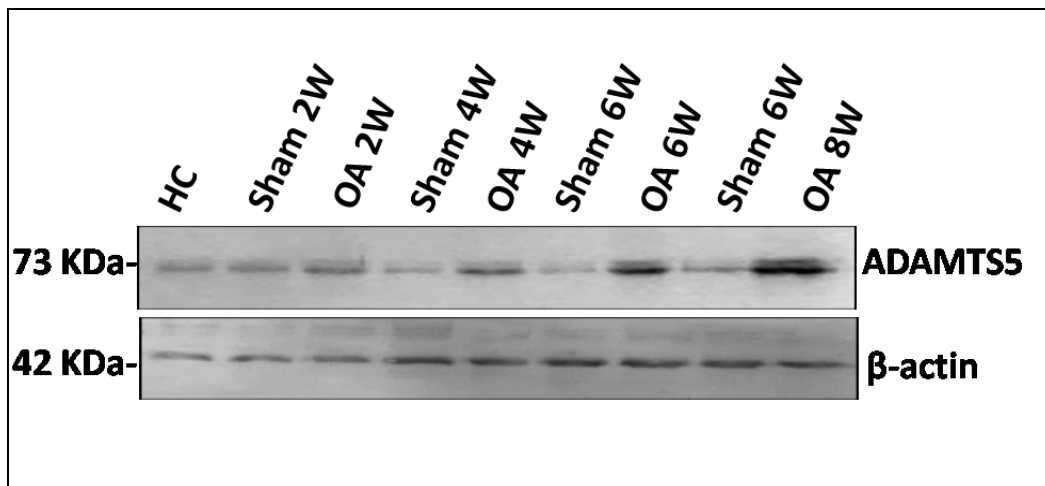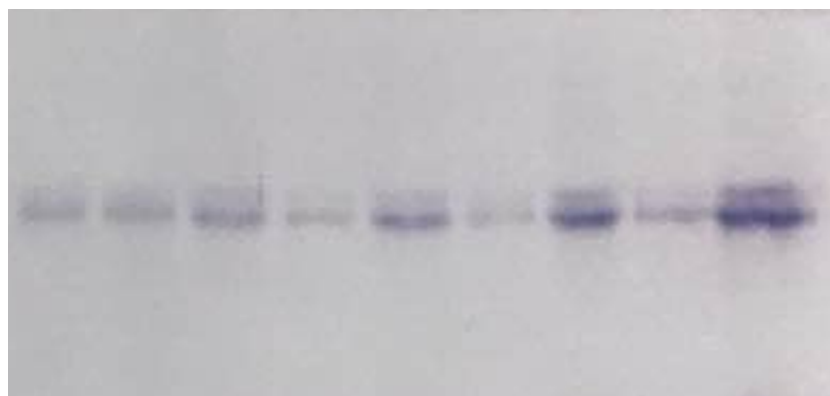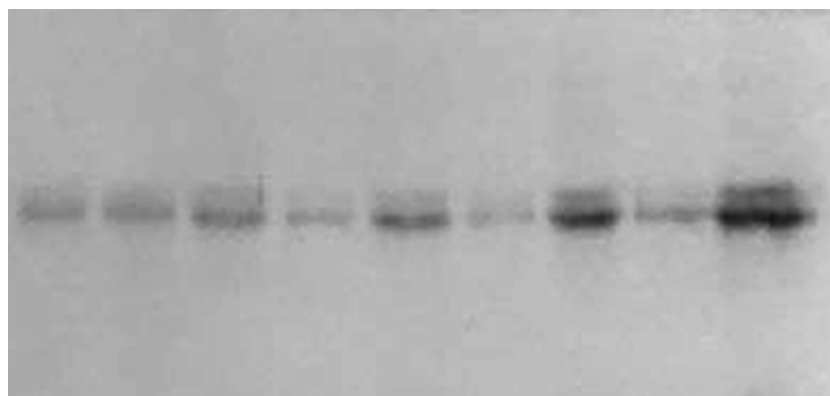

(C): FSTL1 blot 1

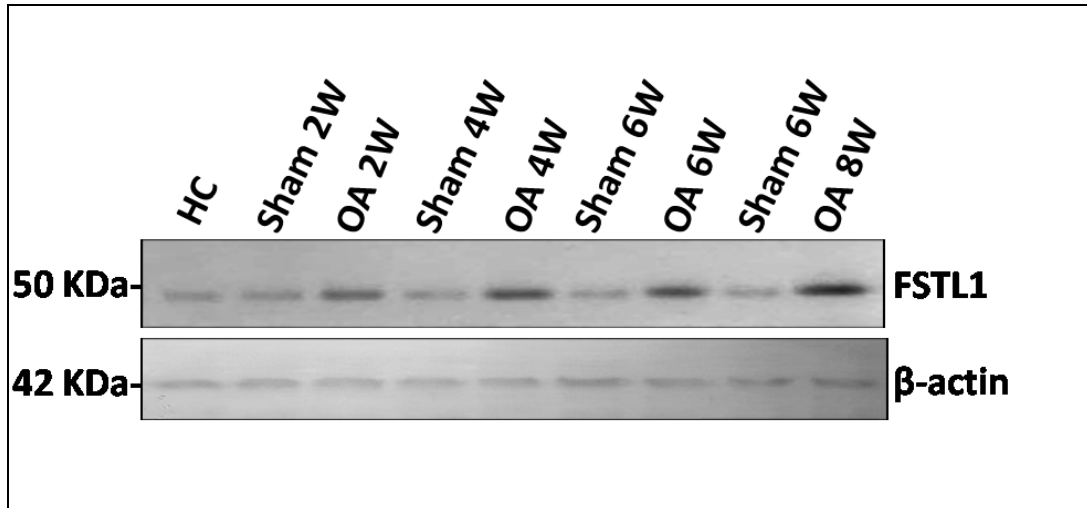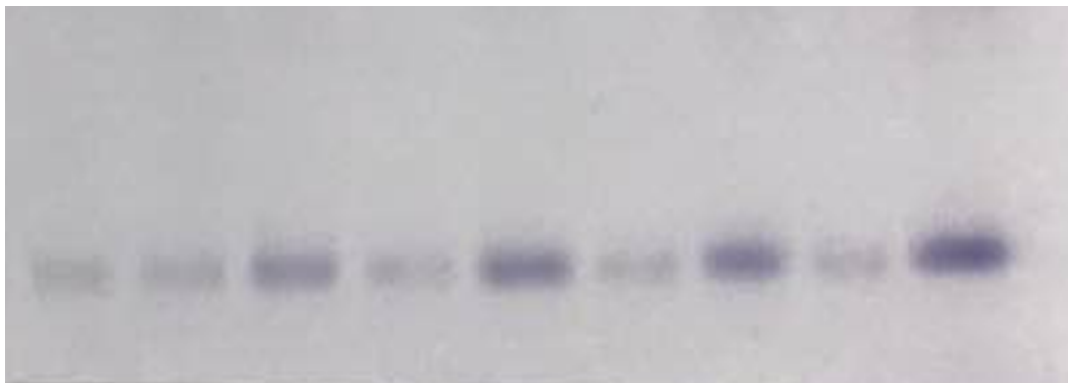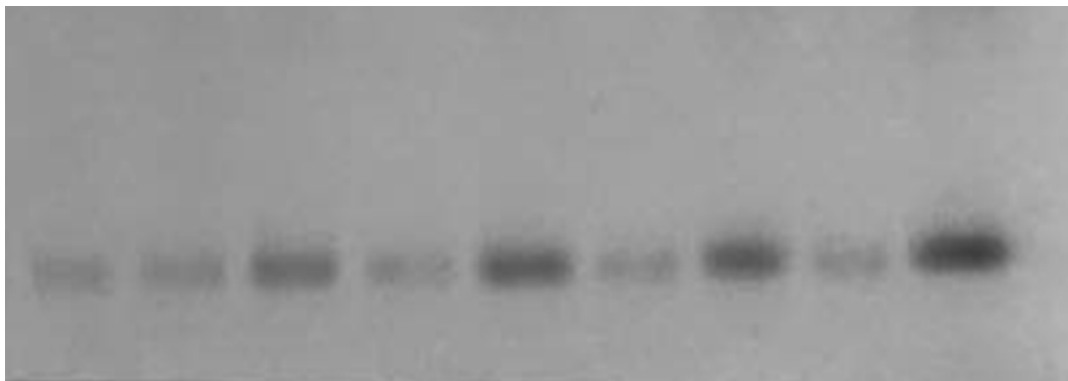

(D): FSTL1 blot 2

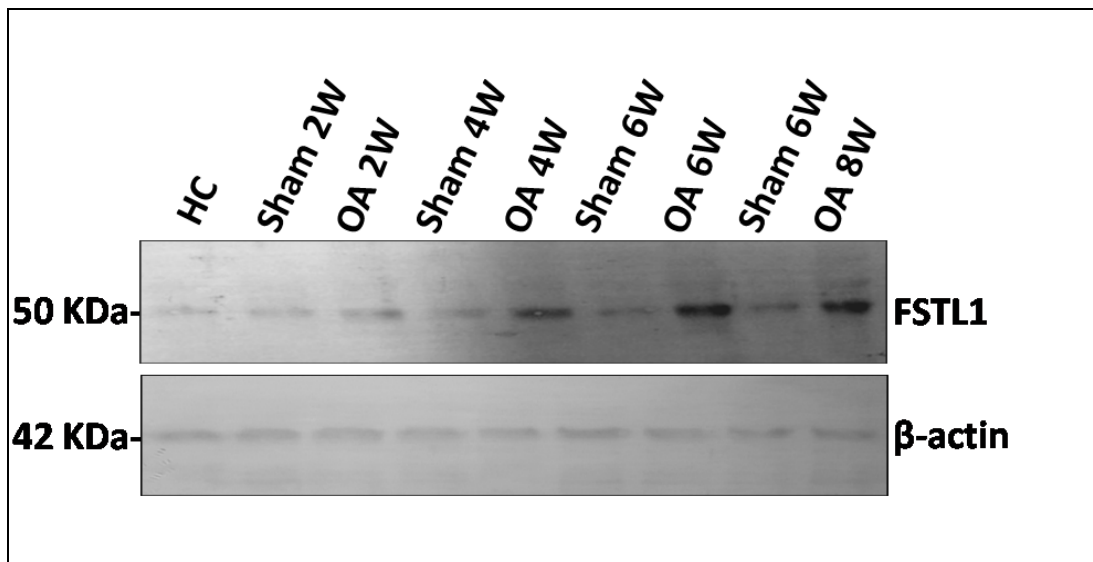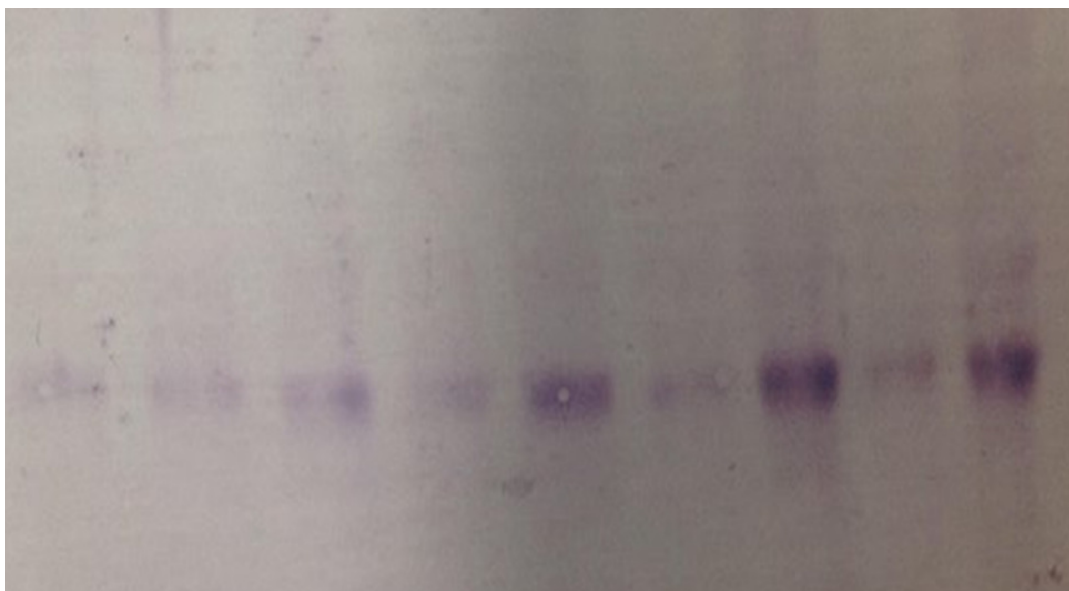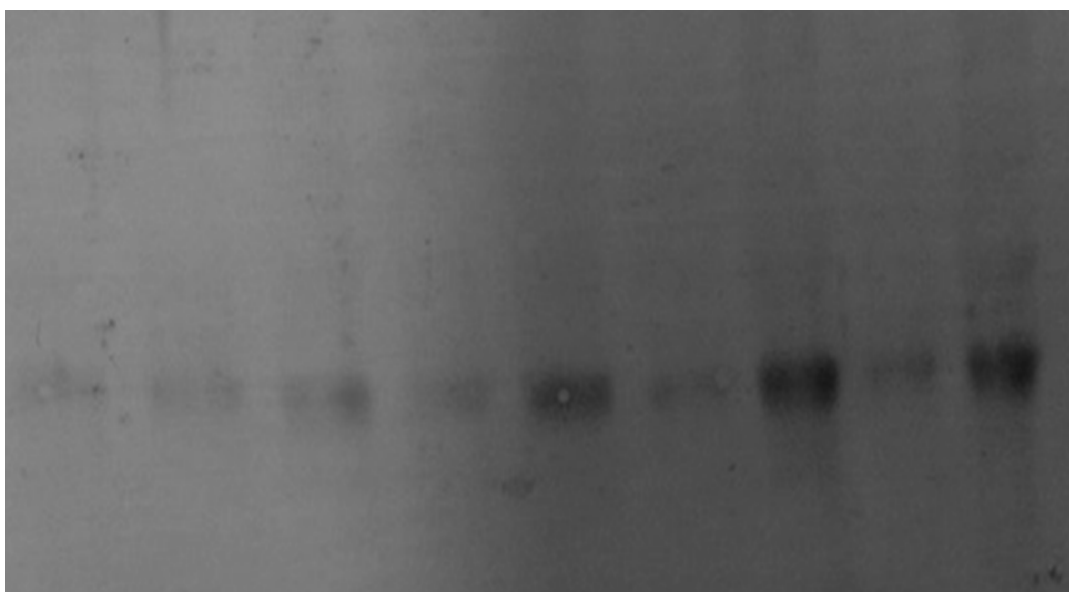

**(E):  $\beta$ -actin blot 1**

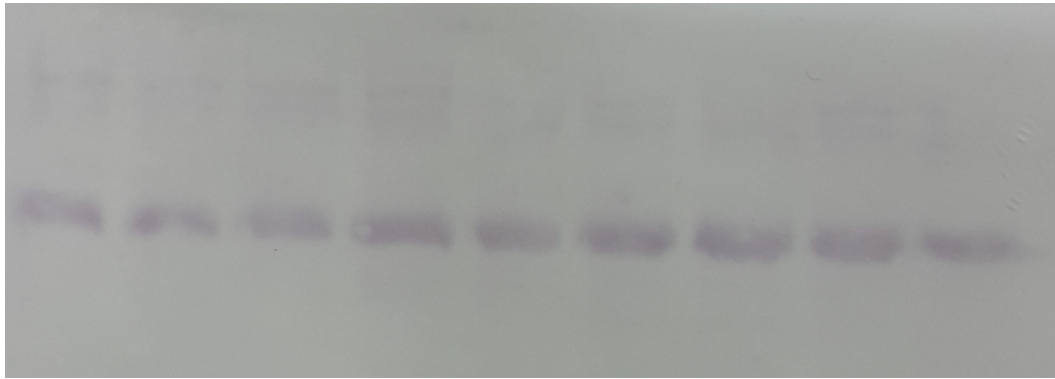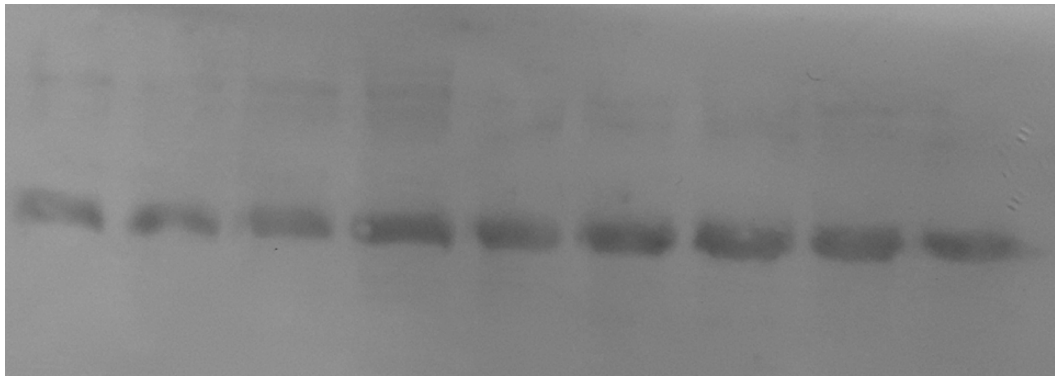

**(F):  $\beta$ -actin blot 2**

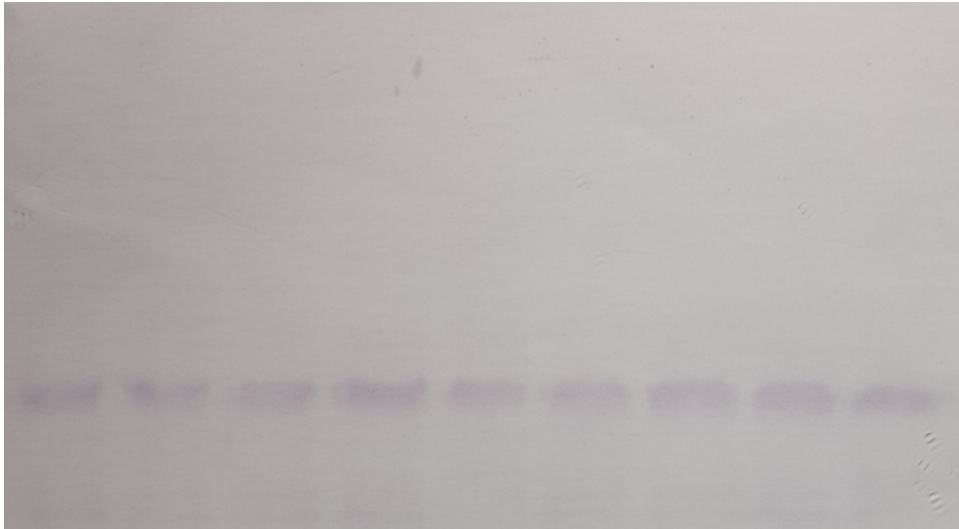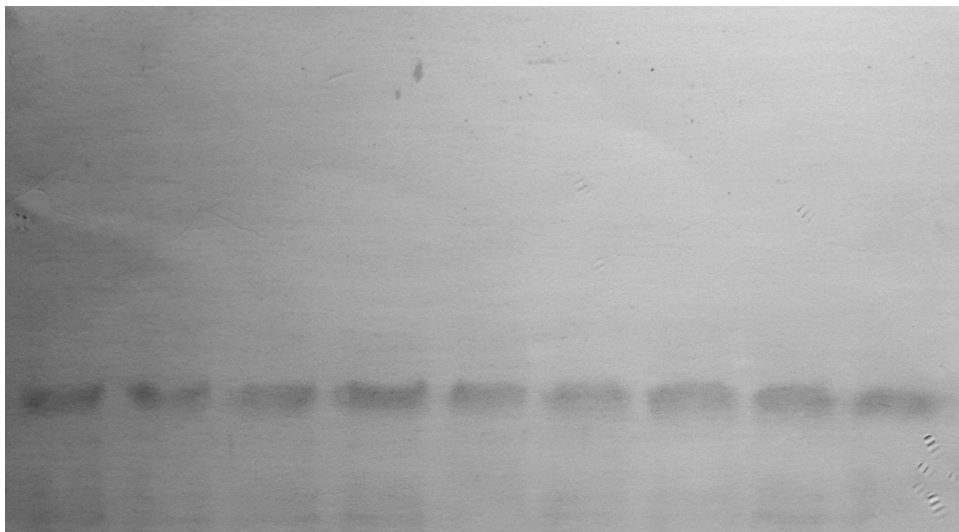

Supplement: CART-18-0176-Suplimantary_materials.pdf [file CART-18-0176-Suplimantary_materials.pdf]
